# Supplementary material for: Evaluation of the effects of a generic substitution policy implemented in Chile
Source: PubMed Central journal article supplement (PMC6407566; doi:10.1136/bmjgh-2018-000922), 2019-03-04
Supplement: bmjgh-2018-000922supp001.pdf [file bmjgh-2018-000922supp001.pdf]

**Supplementary File 1. List of the 43 active pharmaceutical ingredients included in the decree and whether they were included or excluded in the study**

| <b>Therapeutic category</b> | <b>Molecule</b>      | <b>Included or excluded</b> | <b>Reason for exclusion</b>                                                          |
|-----------------------------|----------------------|-----------------------------|--------------------------------------------------------------------------------------|
| Anti-arrhythmic             | Digoxine             | Excluded                    | The referent defined in the decree were already unbranded generics                   |
| Antibiotic                  | Cefadroxil           | Included                    | N/A                                                                                  |
| Antibiotic                  | Ciprofloxacin        | Excluded                    | The referent was not sold during the study period                                    |
| Antibiotic                  | Cloxacillin          | Excluded                    | The referent was not sold during the study period                                    |
| Antibiotic                  | Doxycycline          | Included                    | N/A                                                                                  |
| Anticholinergic             | Biperiden            | Excluded                    | No longer sold in the Chilean pharmaceutical market                                  |
| Antidepressant              | Clomipramine         | Included                    | N/A                                                                                  |
| Antiepileptic               | Carbamazepine        | Excluded                    | BEQ medicines were not sold during the study period                                  |
| Antiepileptic               | Clonazepam           | Included                    | N/A                                                                                  |
| Antiepileptic               | Phenytoin            | Excluded                    | Did not have sales of any pharmaceutical product with conventional release           |
| Antiepileptic               | Valproic acid        | Excluded                    | Did not have sales of any pharmaceutical product with conventional release           |
| Vasodilator                 | Isosorbide dinitrate | Excluded                    | The referent defined in the decree was a different molecule (isosorbide mononitrate) |
| Antihistaminic              | Chlorphenamine       | Excluded                    | The referent was not sold during the study period                                    |
| Antihypertensive            | Losartan             | Included                    | N/A                                                                                  |
| Antihypertensive            | Verapamil            | Included                    | N/A                                                                                  |
| Antineoplastic              | Imatinib             |                             | DDD is not defined                                                                   |
| Antithrombotic              | Acenocoumarol        | Included                    | N/A                                                                                  |
| Antithyroid                 | Levothyroxine        | Included                    |                                                                                      |
| antiretroviral              | Abacavir             | Excluded                    | BEQ medicines were not sold during the study period                                  |
| antiretroviral              | Atazanavir           | Excluded                    | Existing patent during the study period                                              |
| antiretroviral              | Efavirenz            | Excluded                    | Existing patent during the study period                                              |
| antiretroviral              | Stavudine            | Excluded                    | Did not have sales of any pharmaceutical product with conventional release           |
| antiretroviral              | Fosamprenavir        | Excluded                    | Did not have sales of any pharmaceutical product with conventional release           |

|                   |                       |          |                                                                            |
|-------------------|-----------------------|----------|----------------------------------------------------------------------------|
| antiretroviral    | Indinavir             | Excluded | Did not have sales of any pharmaceutical product with conventional release |
| antiretroviral    | Lamivudine            | Excluded | BEQ medicines were not sold during the study period                        |
| antiretroviral    | Nevirapine            | Excluded | BEQ medicines were not sold during the study period                        |
| antiretroviral    | Ritonavir             | Excluded | BEQ medicines were not sold during the study period                        |
| antiretroviral    | Saquinavir            | Excluded | Did not have sales of any pharmaceutical product with conventional release |
| antiretroviral    | Tenofovir disoproxil  | Excluded | Existing patent during the study period                                    |
| antiretroviral    | Zidovudine            | Included | N/A                                                                        |
| Corticosteroid    | Prednisone            | Included | N/A                                                                        |
| Diuretic          | Furosemide            | Excluded | The referent was not sold during the study period                          |
| Gonadotropin      | Clomifene             | Excluded | BEQ medicines were not sold during the study period                        |
| Hypoglycemic      | Glibenclamide         | Excluded | The referent was not sold during the study period                          |
| Hypoglycemic      | Metformin             | Included | N/A                                                                        |
| Hypolipidemic     | Atorvastatin          | Included | N/A                                                                        |
| Immunosuppressant | Cyclosporine          | Included | N/A                                                                        |
| Immunosuppressant | Methotrexate          | Excluded | The referent defined in the decree were already unbranded generics         |
| Immunosuppressant | Mycophenolate mofetil | Included | N/A                                                                        |
| Immunosuppressant | Tacrolimus            | Included | N/A                                                                        |
| NSAID             | Diclofenac            | Excluded | Did not have sales of any pharmaceutical product with conventional release |
| NSAID             | Ketoprofen            | Included | N/A                                                                        |
| Propulsive        | Metoclopramide        | Excluded | The referent was not sold during the study period                          |

Legend: N/A= not applicable

From the original list of 43 APIs, we excluded one active pharmaceutical ingredient (API) whose Daily Defined Dose (DDD) is not specified in the WHO registry, namely imatinib, which probably does not have a DDD due to the different indications depending on the type of cancer. We further excluded 3 APIs where the referent was defined as a different molecule than the API included in the decree (e.g isosorbide dinitrate versus isosorbide mononitrate), or the referents defined in the decree were

already unbranded generics (digoxin and methotrexate). Later, we excluded 7 APIs that did not have sales of any pharmaceutical product with conventional-release (phenytoin, diclofenac, fosamprenavir, indinavir, saquinavir, stavudine and valproic acid: found only in modified-release). Also, 3 APIs under an existing patent during the study period were excluded: atazanavir (currently under patent), tenofovir (patent expired during 2017), and efavirenz (patent expired during 2014). We further excluded 6 APIs in which the referent was not sold during the study period (metoclopramide, glibenclamide, chlorphenamine, cloxacillin, furosemide and ciprofloxacin), and 6 APIs that, although the referent was sold, we could not find sales of bioequivalent medicines during the study period (abacavir, lamivudine, nevirapine, ritonavir, clomiphene, and carbamazepine). Finally, we excluded 1 API whose sales level was very small and, in fact, is no longer sold in the Chilean market (biperiden).

**Supplementary File 2. Active Pharmaceutical Ingredients that were used for the sensitivity analysis.**

| <b>API included in the study</b> | <b>APIs considered as alternatives</b>                   |
|----------------------------------|----------------------------------------------------------|
| <b>Atorvastatin</b>              | Ezetimibe<br>Pitavastatin<br>Pravastatin<br>Rosuvastatin |
| <b>Cefadroxil</b>                | Amoxicillin<br>Ampicillin<br>Flucloxacillin              |
| <b>Doxycycline</b>               | None                                                     |
| <b>Clonazepam</b>                | Clobazam<br>Clorazepate                                  |
| <b>Ketoprofen</b>                | Dexibuprofen<br>Flurbiprofen<br>Ketorolac                |
| <b>Levothyroxine</b>             | None                                                     |
| <b>Losartan</b>                  | Lisinopril                                               |
| <b>Metformin</b>                 | None                                                     |
| <b>Prednisone</b>                | Dexamethasone<br>Hydrocortisone<br>Methylprednisolone    |

**Supplementary File 3. Median Prices and Interquartile ranges of bioequivalent and referent medicines in 2011 and 2016.**

| <b>ACTIVE PHARMACEUTICAL INGREDIENT</b> | <b>Median price of BEQ in 2011 in USD (IQR)</b> | <b>Median price of BEQ in 2016 in USD (IQR)</b> | <b>Median price of referent in 2011 in USD (IQR)</b> | <b>Median price of referent in 2018 in USD (IQR)</b> |
|-----------------------------------------|-------------------------------------------------|-------------------------------------------------|------------------------------------------------------|------------------------------------------------------|
| <b>GROUP 1</b>                          |                                                 |                                                 |                                                      |                                                      |
| Ciclosporin                             | 15.67<br>(15.64 , 15.69)                        | 18.28<br>(18.25 , 18.31)                        | 8.98<br>(8.63 , 9.28)                                | 13.65<br>(13.57 , 13.69)                             |
| Verapamil                               | 2.57<br>(2.54 , 2.59)                           | 5.57<br>(5.54 , 5.6)                            | 2.34<br>(2.22 , 2.45)                                | 4.06<br>(3.93 , 4.07)                                |
| Tacrolimus                              | 26.702<br>(26.701 , 26.704)                     | 32.59<br>(32.56 , 32.62)                        | 13.91<br>(12.06 , 15.8)                              | 21.65<br>(21.35 , 22)                                |
| Clomipramine                            | 3.98<br>(3.94 , 4.03)                           | 8.04<br>(8 , 8.09)                              | 2.98<br>(2.96 , 3.09)                                | 6.53<br>(6.09 , 6.75)                                |
| Acenocoumarol                           | 1.06<br>(0.74 , 1.38)                           | 2.73<br>(2.72 , 2.74)                           | 0.93<br>(0.44 , 1.14)                                | 2.09<br>(2.07 , 2.1)                                 |
| Mycophenolate mofetil                   | 12.16<br>(8.4 , 15.93)                          | 20.64<br>(20.6 , 20.69)                         | 6.18<br>(5.43 , 8.76)                                | 12.68<br>(12.57 , 12.88)                             |
| Zidovudine                              | Not sold                                        | 9.27<br>(9.25 , 9.29)                           | 3.7<br>(3.58 , 3.88)                                 | Not sold                                             |
| <b>GROUP 2</b>                          |                                                 |                                                 |                                                      |                                                      |
| Atorvastatin                            | 1.07<br>(0.78 , 1.26)                           | 1.91<br>(1.9 , 1.92)                            | 0.46<br>(0.30 , 0.88)                                | 1.23<br>(1.22 , 1.24)                                |
| Cefadroxil                              | 8.91<br>(8.87 , 8.96)                           | 10.31<br>(10.26 , 10.37)                        | 6.72<br>(6.68 , 6.77)                                | 7.64<br>(7.57 , 7.82)                                |
| Doxycycline                             | 2<br>(1.99 , 2.004)                             | 3.16<br>(3.14 , 3.18)                           | 1.39<br>(1.38 , 1.4)                                 | 2.41<br>(2.397 , 2.421)                              |
| Losartan                                | 0.552<br>(0.391 , 0.689)                        | 1.165<br>(1.152 , 1.178)                        | 0.358<br>(0.114 , 0.625)                             | 0.898<br>(0.896 , 0.92)                              |
| Ketoprofen                              | 0.98<br>(0.71 , 1.26)                           | 2.89<br>(2.89 , 2.89)                           | 0.8<br>(0.67 , 0.89)                                 | 1.6<br>(1.59 , 1.6)                                  |
| Levothyroxine                           | 0.259<br>(0.258 , 0.26)                         | 0.54<br>(0.39 , 0.7)                            | 0.24<br>(0.23 , 0.24)                                | 0.32<br>(0.31 , 0.33)                                |
| Prednisone                              | 0.288<br>(0.285 , 0.29)                         | 0.57<br>(0.56 , 0.58)                           | 0.19<br>(0.18 , 0.2)                                 | Not sold                                             |
| Metformin                               | 0.8<br>(0.46 , 0.89)                            | 1.1<br>(1.04 , 1.16)                            | 0.73<br>(0.61 , 0.82)                                | 1<br>(0.95 , 1.04)                                   |
| Clonazepam                              | 2.44<br>(1.72 , 2.54)                           | 3.42<br>(3.4 , 3.45)                            | 1.71<br>(1.23 , 1.74)                                | 2.64<br>(2.62 , 2.64)                                |
